# Supplementary material for: Controversial Aspects of Diagnostics and Therapy of Idiopathic Condylar Resorption: An Analysis of Evidence- and Consensus-Based Recommendations Based on an Interdisciplinary Guideline Project
Source: MDPI journal article supplement (doi:10.3390/jcm12154946), 2023-07-27
Supplement: s1 [file s1]

<sup>1</sup> **Table S1.** Members of the working group "oral and maxillofacial surgeons" (OMFS) of the German Association for Oral and Maxillofacial Surgery (Deutsche Gesellschaft für Mund-, Kiefer- und Gesichtschirurgie – DGMKG).

| Members                                                                            | Department/Clinic/Medical Practice                                                                                                                              |
|------------------------------------------------------------------------------------|-----------------------------------------------------------------------------------------------------------------------------------------------------------------|
| Univ.-Prof. Dr. med. Dr. med.<br>dent.<br>Johannes Kleinheinz                      | Klinik für Mund-, Kiefer und Gesichtschirurgie<br>Universitätsklinikum Münster<br>Albert-Schweitzer-Campus 1<br>48149 Münster                                   |
| Univ.-Prof. Dr. med. Dr. med.<br>dent.<br>Andreas Kolb                             | Klinik für Mund-, Kiefer- und Gesichtschirurgie<br>Medizinische Universität Innsbruck<br>Christoph-Probst-Platz 1, Innrain 52 A<br>6020 Innsbruck<br>Österreich |
| Univ.-Prof. Dr. med. Dr. med.<br>dent.,<br>Prof. h.c. (BNMU, Kyiv)<br>Andreas Neff | Klinik und Poliklinik für Mund-, Kiefer- und Gesichtschirurgie<br>Universitätsklinikum Marburg<br>Baldingerstraße<br>35043 Marburg                              |
| Prof. Dr. med. Dr. med. dent.<br>Christoph Pautke                                  | Medizin & Ästhetik Praxisklinik für Mund-, Kiefer- und<br>plastische Gesichtschirurgie<br>Lenbachplatz 2a<br>80333 München                                      |
| Dr. med. Dr. med. dent.<br>Andreas Schön                                           | Praxisklinik für Mund-, Kiefer- und Gesichtschirurgie<br>Bahnstraße 140<br>53842 Troisdorf                                                                      |
| Dr. med. Dr. med. dent.<br>Marcus Teschke                                          | Praxis für Gesichtschirurgie & Kiefergelenkschirurgie<br>Brockdorfstr.90<br>22149 Hamburg                                                                       |
| Dr. med. Dr. med. dent.<br>Astrid Toferer                                          | Klinische Abteilung für Mund-, Kiefer- und Gesichtschirurgie<br>Medizinische Universität Graz<br>Auenbruggerplatz 5/6<br>8036 Graz                              |

**Table S2.** Participating medical Expert Associations including the elected Representatives.

| Association                                                                           | Elected Representative                                         |
|---------------------------------------------------------------------------------------|----------------------------------------------------------------|
| Deutsche Gesellschaft für Funktionsdiagnostik<br>und –therapie(DGFDT)                 | Priv.-Doz. Dr. med. dent. M. Oliver Ahlers                     |
| Deutsche Gesellschaft für Kieferorthopädie<br>(DGKFO)                                 | Priv.-Doz. Dr. med. dent. Dr. sc. hum. Christian<br>Kirschneck |
| Deutsche Gesellschaft für Kieferorthopädie<br>(DGKFO)                                 | Univ.-Prof. Dr. med. dent. Christopher J. Lux                  |
| Deutsche Gesellschaft für Prothetische<br>Zahnmedizin und Biomaterialien e.V. (DGPro) | Univ.-Prof. Dr. med. dent. Peter Ottl                          |
| Deutsche Röntgengesellschaft e.V. (DRG)                                               | Univ.-Prof. Dr. med. Gabriele Krombach                         |
| Deutscher Verband für Physiotherapie e.V.<br>(ZVK)                                    | Ima Feurer                                                     |

**Table S3.** Laboratory parameters for differential diagnosis of inflammatory temporomandibular joint diseases in form of rheumatoid arthritis<sup>1</sup>.

|                     |                                                            |
|---------------------|------------------------------------------------------------|
| Blood sedimentation | frequently elevated in (untreated) rheumatoid<br>arthritis |
|---------------------|------------------------------------------------------------|

<sup>1</sup> Cf. S3 guideline „Management der frühen rheumatoiden Arthritis“ 2019, register number 060 - 002

|                                                           |                                                                                                                                                                                                                                                                            |
|-----------------------------------------------------------|----------------------------------------------------------------------------------------------------------------------------------------------------------------------------------------------------------------------------------------------------------------------------|
|                                                           | <u>non-specific</u> (also in anemia, other inflammatory diseases)                                                                                                                                                                                                          |
| C-reactive protein (CRP)                                  | quantitatively more accurate and shows a quicker response than blood sedimentation, better identification, detection of so-called acute phase reaction (disease activity), equally <u>non-specific</u> as blood sedimentation                                              |
| Blood count                                               | in case of prolonged active disease: inflammatory anemia (normochromic or hypochromic, normocytic), thrombocytosis                                                                                                                                                         |
| IgM rheumatoid factor (RF)                                | positive in 65-80% of patients with rheumatoid arthritis; specificity approx. 80%, as also detectable in collagenosis, viral hepatitis, malignancy and (rarely) also in healthy individuals                                                                                |
| Antibodies against citrullinated proteins/peptides (ACPA) | highly specific for rheumatoid arthritis (> 95%) and as sensitive (64-86%) as rheumatoid factor; can be positive even before clinical manifestation of rheumatoid arthritis and is highly predictive of a chronic course and erosive course in presence of early arthritis |
| Urine analysis                                            | exclusion of hematuria, proteinuria as an indication of other diseases (e.g., collagenoses)                                                                                                                                                                                |
| Antinuclear antibodies (ANA)                              | differential diagnostic indication for collagenoses (e.g. systemic lupus erythematosus), weakly positive also in rheumatoid arthritis or healthy individuals                                                                                                               |
| Antineutrophil Cytoplasmic Antibody (ANCA)                | differential diagnostic indication for vasculitis (e.g. granulomatosis with polyangiitis)                                                                                                                                                                                  |
| HLA-B27                                                   | differential diagnostic indication for spondylarthritis                                                                                                                                                                                                                    |
| Uric acid / joint punctate                                | differentiation from polyarticular gout (rare) and infectious arthritis (monarthrotic, large joints)                                                                                                                                                                       |

Source 1: Cf. S3 guideline „Management der frühen rheumatoiden Arthritis“ 2019, register number 060 – 002“, <https://register.awmf.org/de/leitlinien/detail/060-002>, last downloaded 04.07.2023.

**Table S4.** Summary table of studies for which the validity of diagnosis ICR cannot be guaranteed or papers for which not only patients with ICR have been evaluated.

| author, year, LoE                 | Risk of confusion with degenerative joint diseases                                                                                                                                                                                                                                                                                                                 |
|-----------------------------------|--------------------------------------------------------------------------------------------------------------------------------------------------------------------------------------------------------------------------------------------------------------------------------------------------------------------------------------------------------------------|
| (Alsabban et al. 2018, 4/k+)      | Epidemiological survey among craniomaxillofacial surgeons, thereby no concrete specification of diagnostic criteria of ICR                                                                                                                                                                                                                                         |
| (Nicolielo et al. 2017, 5/k++)    | Summary article, which also included articles on the effects of oestrogen on TMJ osteoarthritis as it is hypothesized that similar hormonal receptor effects and disease mechanisms may play a role                                                                                                                                                                |
| (Posnick und Fantuzzo 2007, 4/k+) | Case series, one case with progressive condylar resorption in context of JIA, one case with idiopathic condylar resorption                                                                                                                                                                                                                                         |
| (Qiu et al. 2010, 4/k+)           | Study evaluating endoscopically assisted reconstruction of the mandibular condyle with a costochondral graft through a modified preauricular approach, patients with diagnoses including osteoarthrosis, ankylosis, tumours, idiopathic condylar resorption, comminuted condylar fracture, and chronic osteomyelitis of the temporomandibular joint were evaluated |

---

|                                      |                                                                                                                                                                                                                                                                                                                                                                                      |
|--------------------------------------|--------------------------------------------------------------------------------------------------------------------------------------------------------------------------------------------------------------------------------------------------------------------------------------------------------------------------------------------------------------------------------------|
| (Troulis und Kaban 2001, 4/k+)       | Study evaluating endoscopic approach to the ramus/condyle unit, patients with diagnoses of idiopathic condylar resorption, subcondylar fracture, mandibular prognathism, condylar hyperplasia, and mandibular asymmetry                                                                                                                                                              |
| (Troulis et al. 2004, 4/k+)          | Study evaluating endoscopic condylectomy, both patients with ICR and degenerative joint disease, and malunion of a fractured condyle were evaluated                                                                                                                                                                                                                                  |
| (Valladares-Neto et al. 2014, 5/k++) | This study reviewed the response of the TMJ to mandibular advancement surgery by analyzing certain risk factors, which included three TMJ changes (disk displacement, arthralgia, and condylar resorption) and two treatment variables (fixation techniques and the amount of advancement).<br>Therefore, a precise separation between cause and consequence is not always possible. |

---
